# Supplementary material for: Tuning the flexibility and thermal storage capacity of solid–solid phase change materials towards wearable applications
Source: Royal Society of Chemistry journal article supplement (doi:10.1039/c9ta13925g), 2020-01-01
Supplement: c9ta13925g1.pdf [file c9ta13925g1.pdf]

## Supplementary Information

### Tuning Thermal Storage Capacity and Flexibility of Solid-Solid Phase Change Materials towards Wearable Application

Jinming Shi,<sup>a</sup> Waseem Aftab,<sup>a</sup> Zibin Liang,<sup>a</sup> Kunjie Yuan,<sup>a</sup> Muhammad Maqbool,<sup>a</sup>  
Haoyang Jiang,<sup>a</sup> Feng Xiong,<sup>a</sup> Mulin Qin,<sup>a</sup> Song Gao,<sup>a</sup> and Ruqiang Zou<sup>\*a</sup>

<sup>a</sup> Beijing Key Laboratory for Theory and Technology of Advanced Battery Materials,  
Department of Materials Science and Engineering, College of Engineering, Peking  
University, Beijing 100871, China. Email: rzou@pku.edu.cn

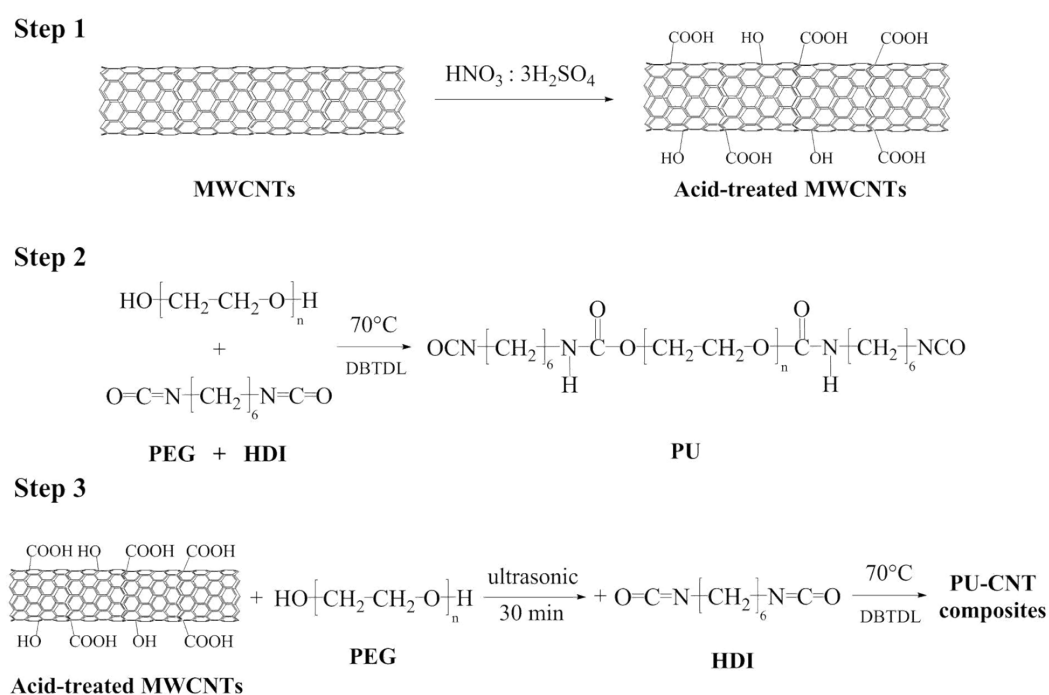

**Scheme S1.** Synthesis and Fabrication Process of the Acid-treated MWCNTs (Step 1),  
PU (Step 2), and PU-CNT Nanocomposites (Step 3).

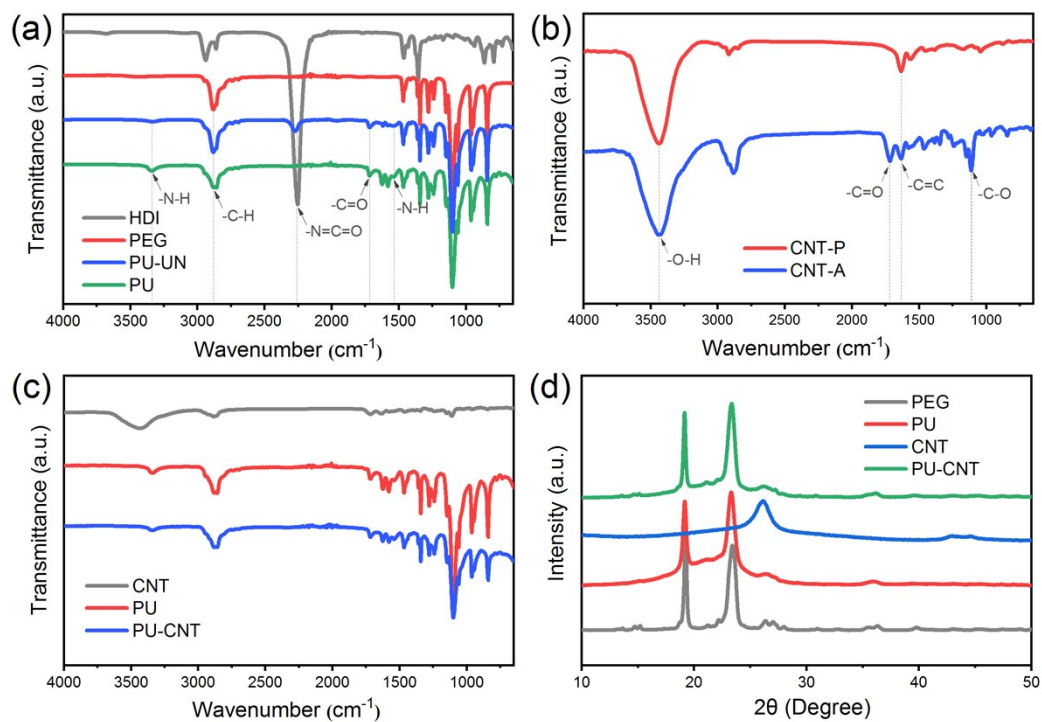

**Figure S1.** The structural characterization. FTIR spectrum of (a) PEG, HDI, PU, and PU-UN, (b) CNT-P and CNT-A, and (c) CNT, PU, and PU-CNT composite. (d) XRD patterns of PEG, PU, CNT, and PU-CNT composite.

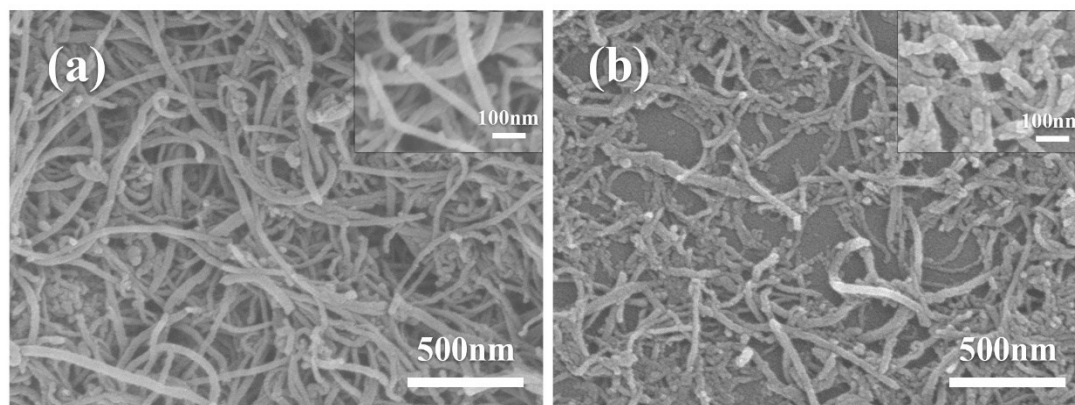

**Figure S2.** The SEM image of (a) CNT-P and (b) CNT-A.

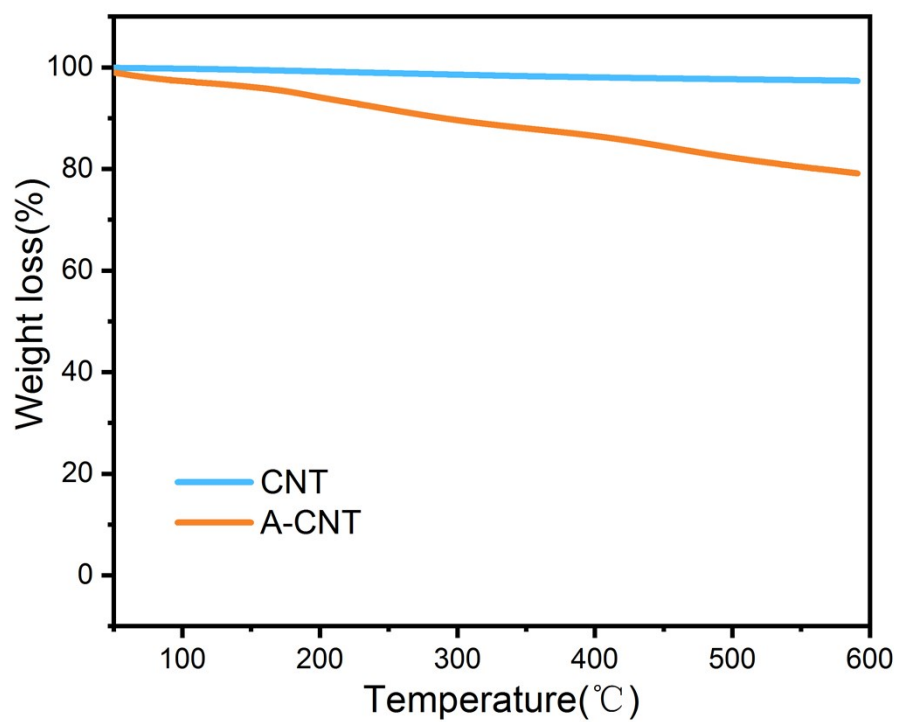

**Figure S3.** The TGA thermograms of CNT and A-CNT.

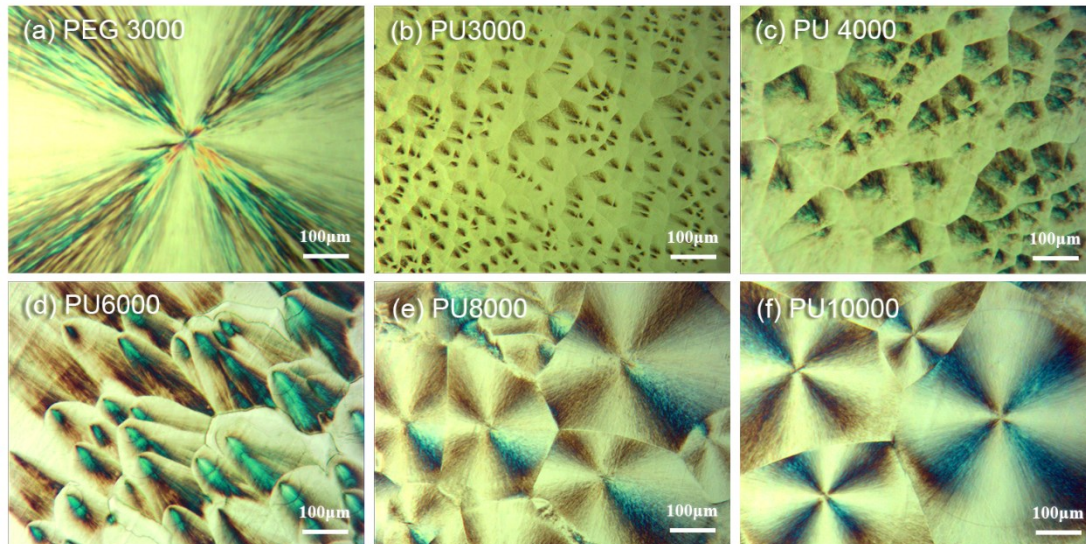

**Figure S4.** The POM image of (a) PEG3000; (b) PU3000; (c) PU4000; (d) PU6000; (e) PU8000; (f) PU10000.

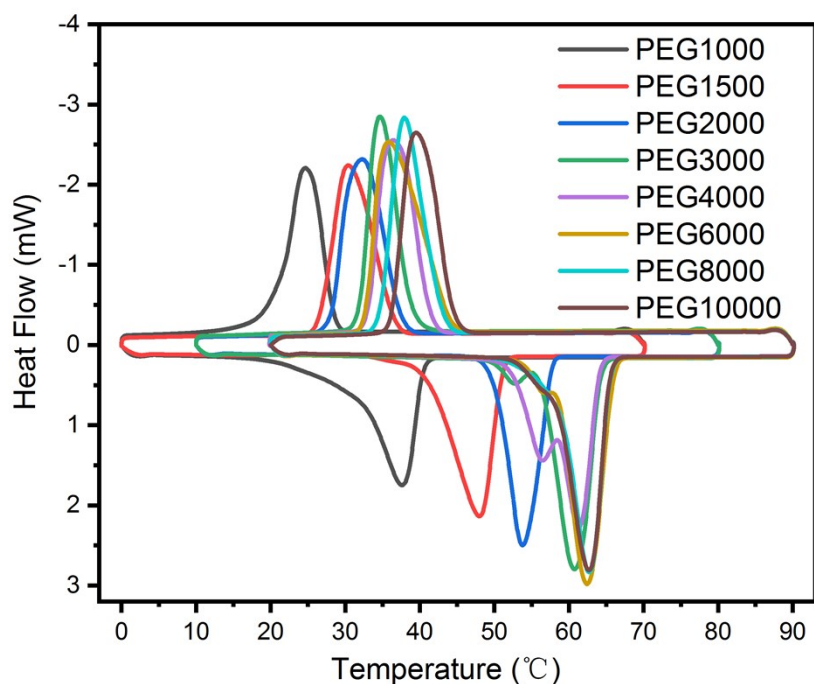

**Figure S5.** The DSC curves of PEG with different molecular weight

**Table S1.** Phase change behavior of PEG with different molecular weight

| sample   | $T_p$ (°C) <sup>a)</sup> |         | $\Delta H$ (J·g <sup>-1</sup> ) <sup>b)</sup> |         |
|----------|--------------------------|---------|-----------------------------------------------|---------|
|          | Heating                  | Cooling | Heating                                       | Cooling |
| PEG1000  | 31.3                     | 28.3    | 152.7                                         | 145.1   |
| PEG1500  | 43.5                     | 37.8    | 154.6                                         | 149.8   |
| PEG2000  | 50.4                     | 37.3    | 163.6                                         | 157.2   |
| PEG3000  | 50.3                     | 38.3    | 171.8                                         | 160.4   |
| PEG4000  | 52.5                     | 41.0    | 173.7                                         | 160.8   |
| PEG6000  | 54.4                     | 43.8    | 174.3                                         | 161.9   |
| PEG8000  | 59.0                     | 43.9    | 174.8                                         | 163.6   |
| PEG10000 | 59.3                     | 44.1    | 175.1                                         | 164.4   |

<sup>a)</sup>  $T_p$  : phase change temperature; <sup>b)</sup>  $\Delta H$  : phase change enthalpy

**Table S2.** Phase change behavior of PU samples with different PEG molecular weight.

| sample  | $T_p$ (°C) <sup>a)</sup> |         | $\Delta H$ (J·g <sup>-1</sup> ) <sup>b)</sup> |         |
|---------|--------------------------|---------|-----------------------------------------------|---------|
|         | Heating                  | Cooling | Heating                                       | Cooling |
| PU1000  | 1.3                      | 2.5     | 34.2                                          | 29.0    |
| PU1500  | 21.3                     | 17.5    | 52.8                                          | 44.9    |
| PU2000  | 32.5                     | 23.8    | 64.8                                          | 58.3    |
| PU3000  | 39.1                     | 31.4    | 78.0                                          | 71.4    |
| PU4000  | 45.0                     | 35.0    | 92.6                                          | 81.7    |
| PU6000  | 46.3                     | 37.5    | 105.2                                         | 94.1    |
| PU8000  | 50.0                     | 40.0    | 118.9                                         | 107.5   |
| PU10000 | 55.0                     | 42.5    | 143.1                                         | 131.9   |

<sup>a)</sup>  $T_p$  : phase change temperature; <sup>b)</sup>  $\Delta H$  : phase change enthalpy

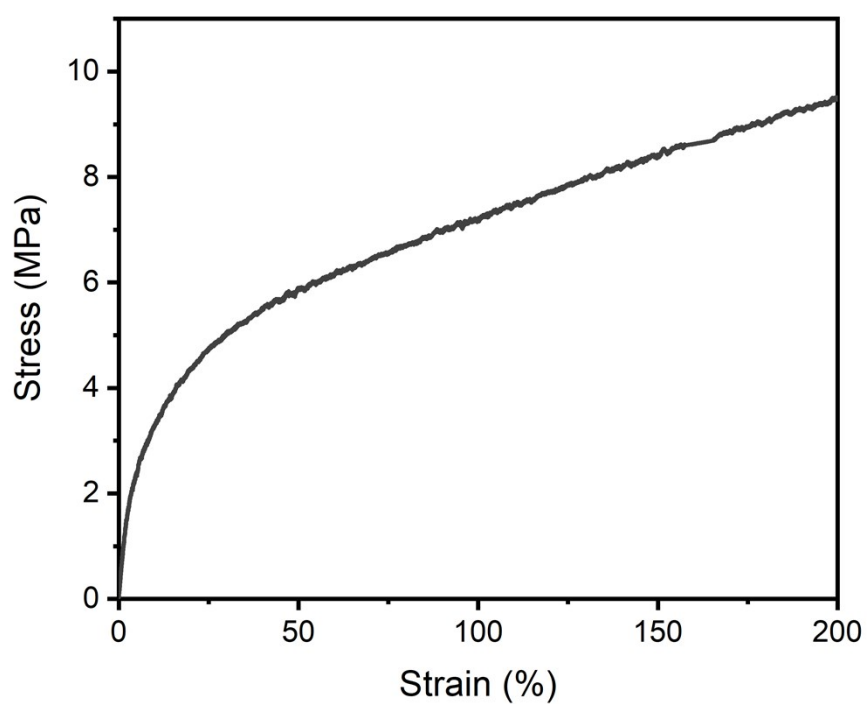

**Figure S6.** The stress and strain profiles of PU1000 sample

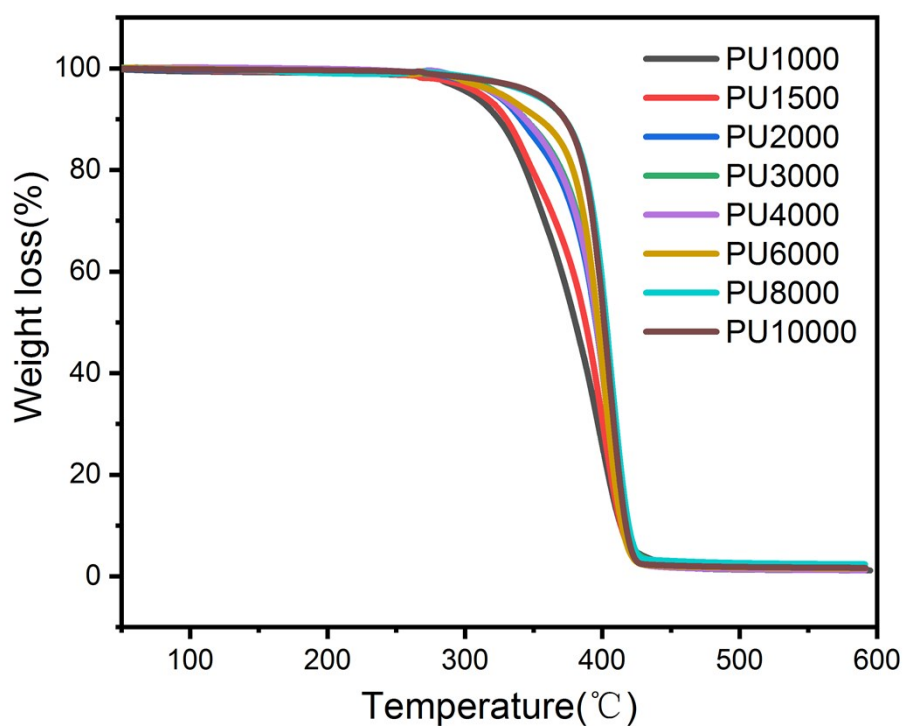

**Figure S7.** The TGA thermograms of PU samples with different PEG molecular weight.

**Table S3.** Phase change behavior of PU3000 and PU-CNT composites.

| sample      | $T_p$ (°C) <sup>a)</sup> |         | $\Delta H$ (J·g <sup>-1</sup> ) <sup>b)</sup> |         |
|-------------|--------------------------|---------|-----------------------------------------------|---------|
|             | Heating                  | Cooling | Heating                                       | Cooling |
| PU3000      | 39.1                     | 31.4    | 78.0                                          | 71.4    |
| PU3000-CNT1 | 39.5                     | 34.1    | 79.2                                          | 72.0    |
| PU3000-CNT2 | 39.2                     | 33.8    | 78.9                                          | 71.8    |
| PU3000-CNT3 | 39.9                     | 34.3    | 78.5                                          | 71.4    |

|             |      |      |      |      |
|-------------|------|------|------|------|
| PU3000-CNT4 | 39.7 | 34.6 | 80.2 | 72.5 |
| PU3000-CNT5 | 42.0 | 33.9 | 85.9 | 75.9 |

---

a)  $T_p$  : phase change temperature;  $^b)\Delta H$  : phase change enthalpy

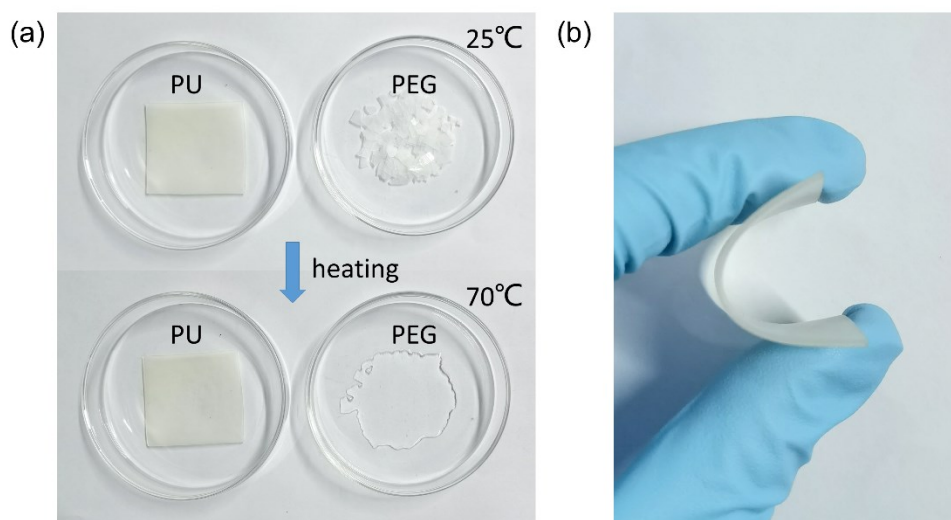

**Figure S8.** (a) Optical images of the pure PU3000 sample and PEG3000 before and after heating: at 70 °C, PU sample still remained solid state while PEG 3000 had become melting state, showing the solid-solid phase transition property of the pure PU. (b) Optical images of the pure PU3000 sample under curling condition, representing the flexibility and shape deformability of the pure PU sample.

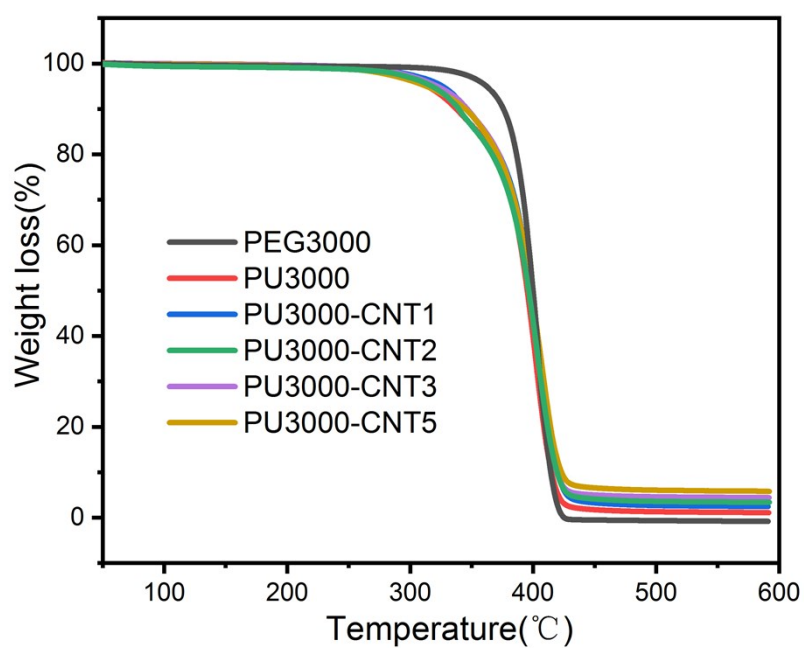

**Figure S9.** The TGA thermograms of PEG, PU, and PU-CNT composites.

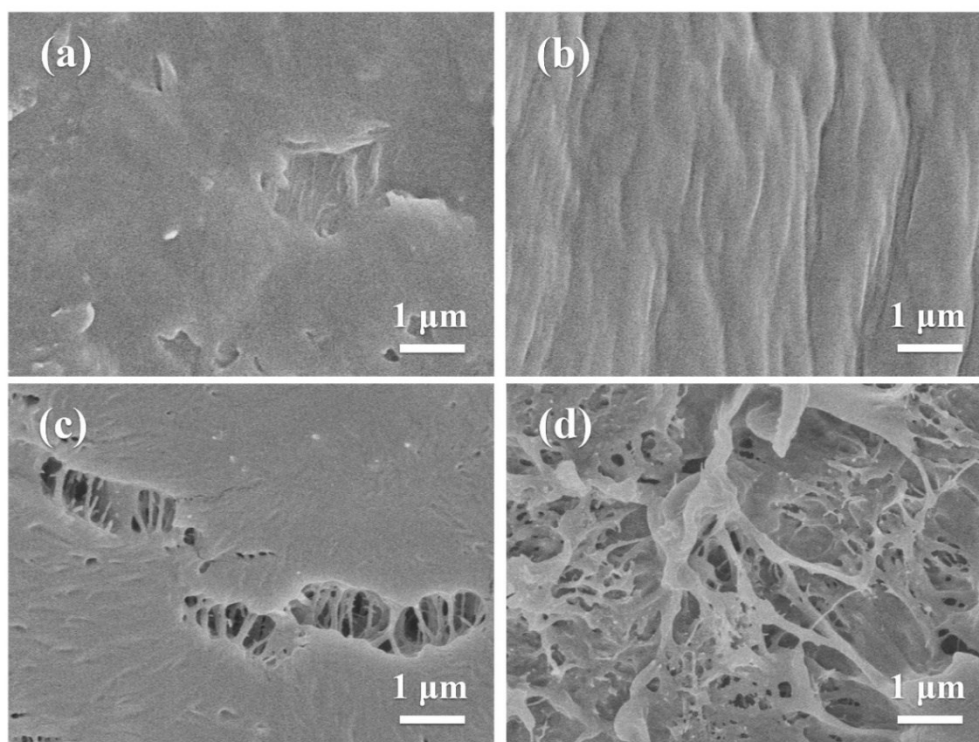

**Figure S10.** The SEM image of (a) the surface of PU; (b) the cross-section of PU; (c) the surface of PU-CNT composite; (d) the cross-section of PU-CNT composite.



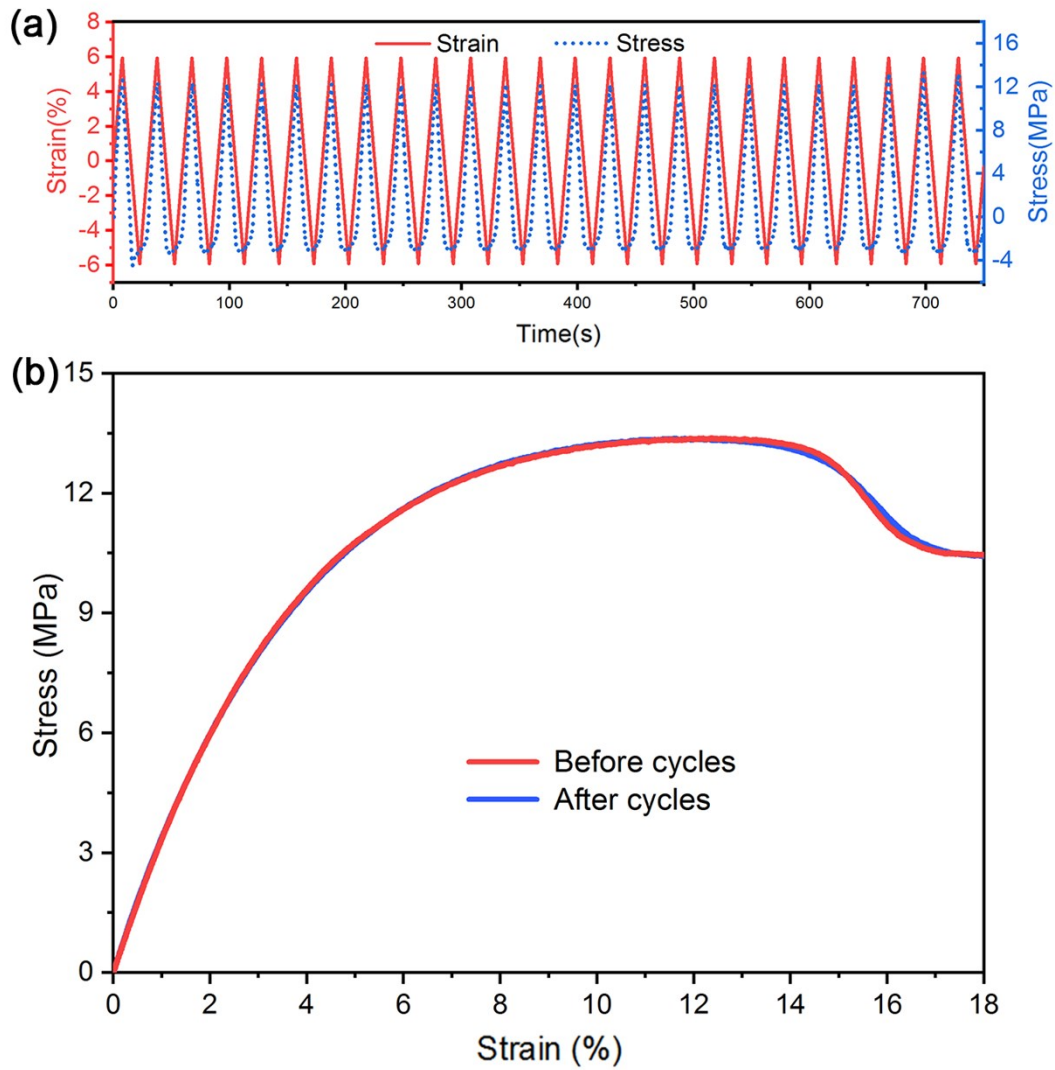

**Figure S11.** (a) The fatigue reliability test for the PU3000 sample with cyclic tensile stretch. (b) the strain-stress curve of the PU3000 sample after 25 tensile stretch cycles.

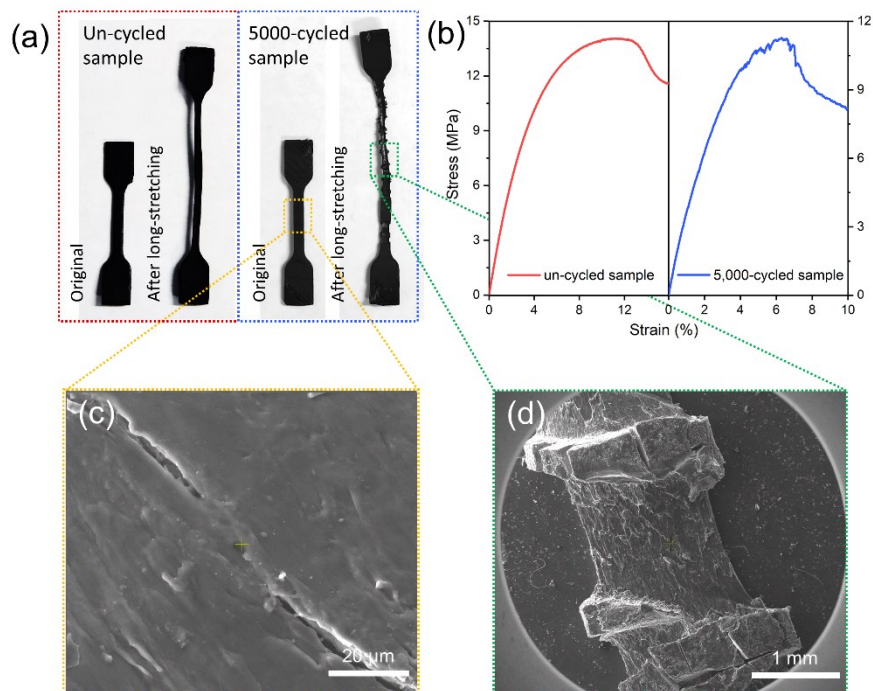

**Figure S12.** (a) The photograph of the original un-cycled sample and the un-cycled sample after long-stretching test (left), and the original 5,000 cycled sample and the 5,000 cycled sample after long-stretching test (right). (b) The long-stretching strain-stress curves of PU-CNT composite samples before and after 5,000 tensile stretch cycles, respectively. (c) The SEM image of the surface of PU-CNT composite after 5,000 tensile stretch cycles. (d) the SEM images of the 5,000 cycled sample after long-stretching test.

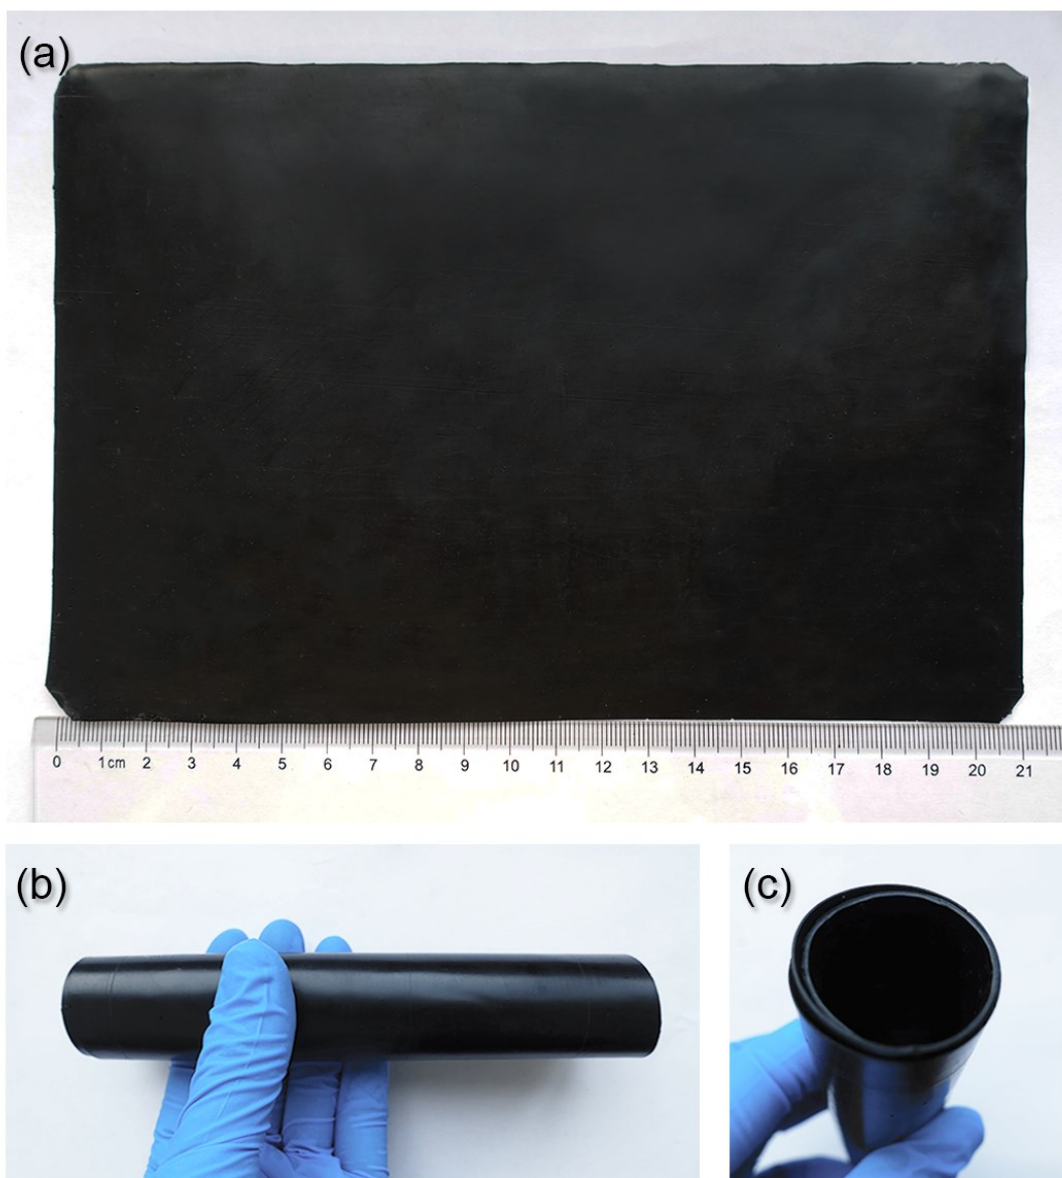

**Figure S13.** The large-scale preparation of this flexible PU-CNT composite films. (a) The photo of the large-scale sample with size of  $21 \times 15$  cm<sup>2</sup>; (b) front view and (c) top view of the large-scale sample under curling.

**Table S4.** The comparison of the thermal and mechanical performance of the currently reported flexible PCMs and the PU-CNT composites.

| Composite                                             | PCM content | $\Delta H_m$ (J g <sup>-1</sup> ) | Yield/break point | Yield/break strength (MPa) | Flexible source  | Ref.      |
|-------------------------------------------------------|-------------|-----------------------------------|-------------------|----------------------------|------------------|-----------|
| graphene aerogel fiber/PEG/fluorocarbon resin coating | 83 wt%      | 124                               | 1.52%             | 12.7                       | graphene aerogel | 1         |
| carbonized cotton cloth/paraffin/TPU                  | 49.25 wt%   | 93.56                             | ~2.5%             | 1.94                       | cotton cloth     | 2         |
| paraffin/OBC/EG                                       | 80 wt%      | 111.4                             | 0.21              | 2.4 (48°C)                 | OBC              | 3         |
| polyolefin elastomer (POE)/stearic acid               | 50 wt%      | -                                 | -                 | 9                          | POE              | 4         |
| paraffin/MWCNTs/PP fiber                              | 80.97 wt%   | 103.26                            | -                 | -                          | PP fiber         | 5         |
| Kevlar nanofiber aerogel films/PEG (200 μm)           | 94.3 wt%    | 162.9                             | 22.2%;            | 2.85                       | Kevlar fiber     | 6         |
| Ag@Kapok fiber/lauric acid                            | 81 vol %    | 146.8                             | -                 | -                          | Kapok fiber      | 7         |
| PEG/cellulose acetate (CA) fibers                     | 30 wt%      | 30.18                             | ~8.2%             | ~7                         | CA               | 8         |
| cellulose-grafted-PA16/GN16                           | 91 wt%      | 78                                | ~1.8%             | 3.6                        | cellulose        | 9         |
| polyurethane/CNT                                      | 97 wt%      | 78.5                              | 10.5%             | 16.3                       | PCM itself       | This work |

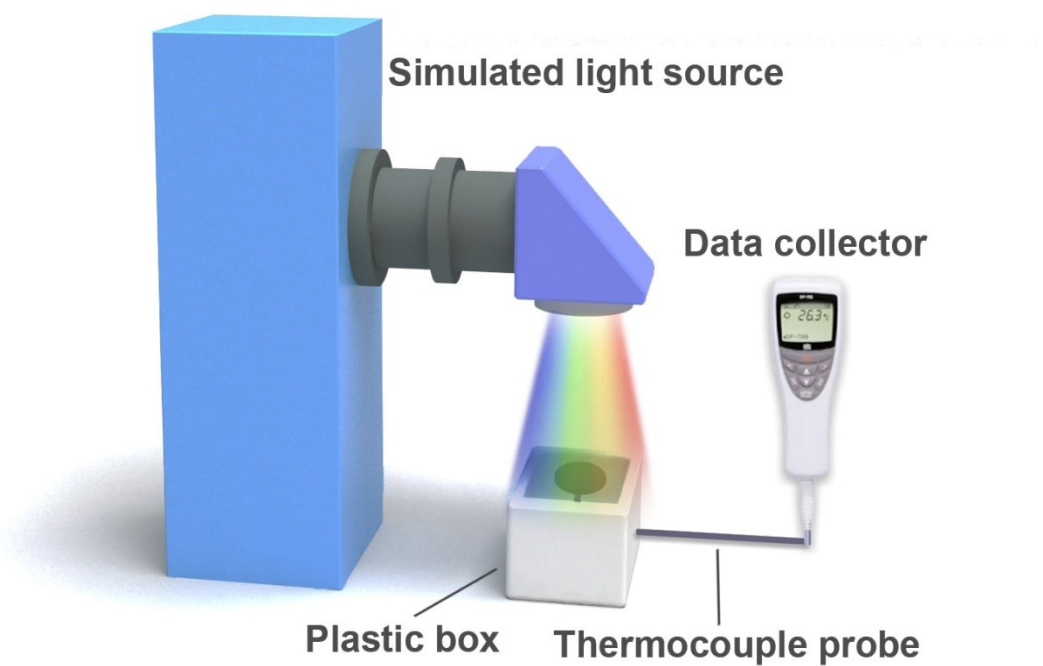

**Figure S14.** Schematic illustration of the experimental setup for the photo-thermal conversion.

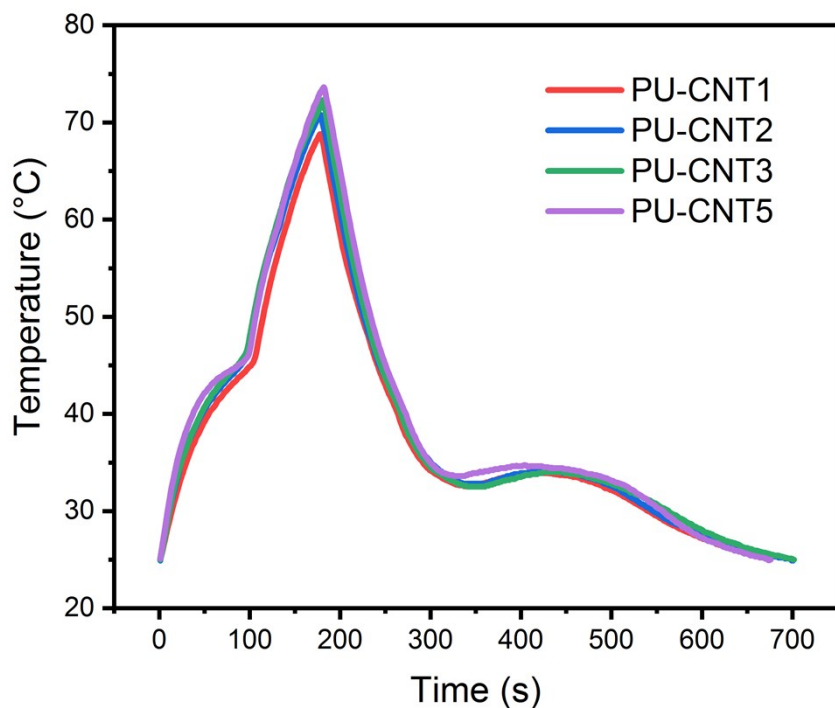

**Figure S15.** Time-temperature evolution curves of PU-CNT composites with increasing CNT wt. content

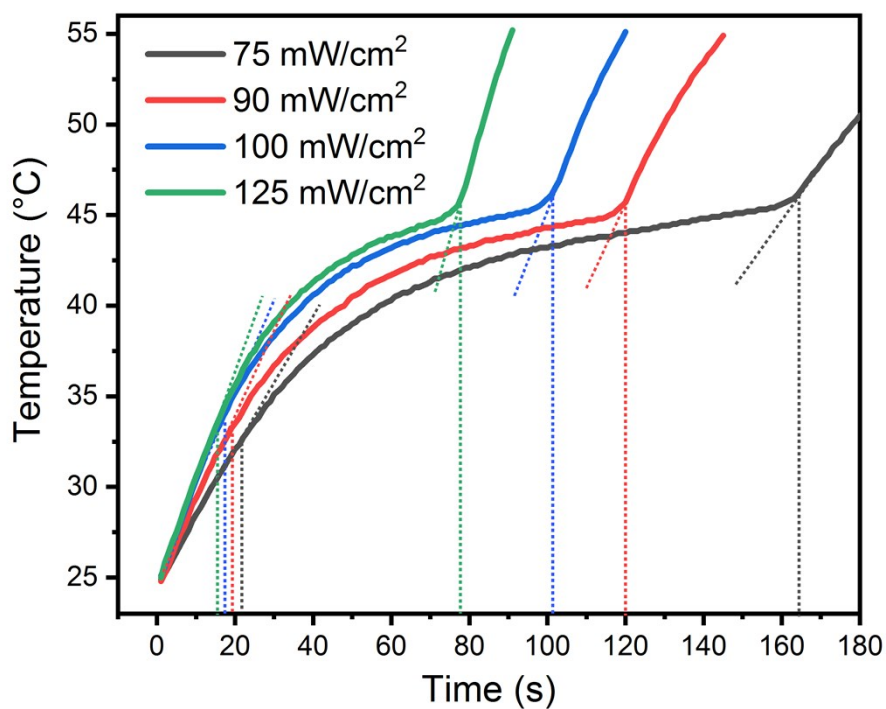

**Figure S16.** Evaluation of phase transition period as function of increasing light intensity during solar charging of PU-CNT5 sample.

**Table S5.** Solar-thermal energy storage performance of PU-CNT5 sample under different light intensities

|                                             |        |        |        |        |
|---------------------------------------------|--------|--------|--------|--------|
| Light Power (mW/cm <sup>2</sup> )           | 75     | 90     | 100    | 125    |
| Start time of phase change (s)              | 21     | 19     | 17     | 15     |
| End time of phase change (s)                | 165    | 120    | 101    | 78     |
| Phase change duration (s)                   | 144    | 101    | 84     | 63     |
| Input energy (J)                            | 13.716 | 11.544 | 10.668 | 10.001 |
| Stored energy (J)                           | 8.590  | 8.590  | 8.590  | 8.590  |
| Energy storage efficiency (%) <sup>a)</sup> | 62.63  | 74.41  | 80.52  | 85.89  |

<sup>a)</sup> The photo-thermal energy storage efficiency was calculated as  $\eta=(m \cdot \Delta H)/(A \cdot P \cdot t)$ , in which m is the mass of sample,  $\Delta H$  is phase change enthalpy, A is the irradiated surface area of sample, P is the power (mW/cm<sup>2</sup>) of irradiation light and t is time of phase change period. The phase change period was determined by tangential method. In this case, A = 1.27 cm<sup>2</sup>, m = 0.10 g,  $\Delta H = 85.90 \text{ J} \cdot \text{g}^{-1}$

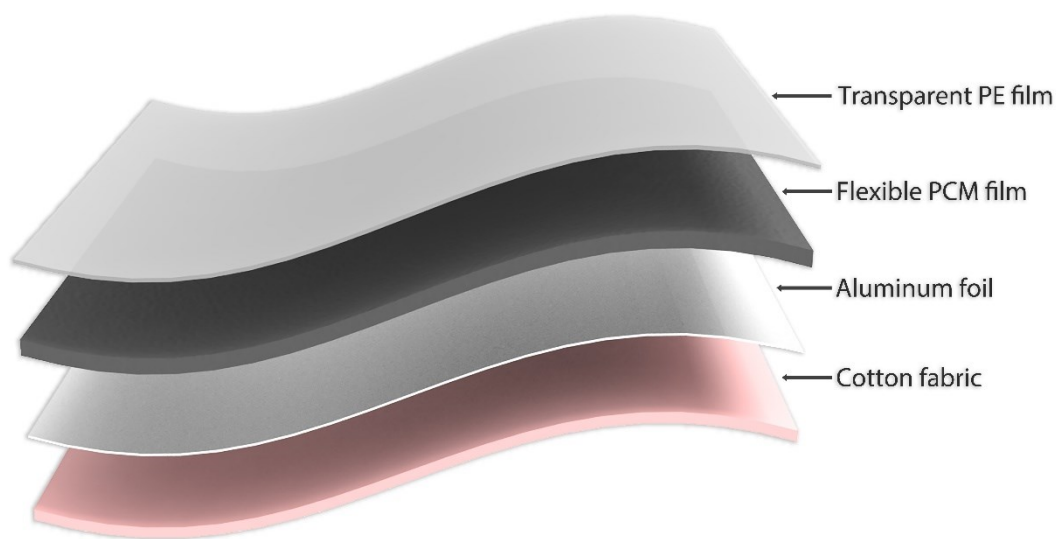

**Figure S17.** Schematic illustration of product composition for the photo-thermal human body management.

## References

1. G. Li, G. Hong, D. Dong, W. Song and X. Zhang, *Advanced Materials*, 2018, **30**, 1801754.
2. M. M. Umair, Y. Zhang, S. Zhang, X. Jin and B. Tang, *Journal of Materials Chemistry A*, 2019, **7**, 26385-26392.
3. W.-W. Li, W.-L. Cheng, B. Xie, N. Liu and L.-S. Zhang, *Energy Conversion and Management*, 2017, **149**, 1-12.
4. J. Du, D. Liu, Z. Zhang, X. Yao, D. Wan, H. Pu and Z. Lu, *Polymer*, 2017, **126**, 206-210.
5. D. Luo, F. Wei, H. Shao, L. Xiang, J. Yang, Z. Cui, S. Qin and J. Yu, *Journal of Materials Science*, 2018, **53**, 15500-15513.
6. J. Lyu, Z. Liu, X. Wu, G. Li, D. Fang and X. Zhang, *ACS Nano*, 2019, **13**, 2236-2245.
7. S. Song, T. Zhao, W. Zhu, F. Qiu, Y. Wang and L. Dong, *ACS Applied Materials & Interfaces*, 2019, **11**, 20828-20837.
8. C. Chen, L. Wang and Y. Huang, *Applied Energy*, 2011, **88**, 3133-3139.
9. Y. Qian, N. Han, Z. Zhang, R. Cao, L. Tan, W. Li and X. Zhang, *ACS Applied Materials & Interfaces*, 2019, **11**, 45832-45843.
